1 **The value of inspiratory muscle training on post-**  
2 **stroke sarcopenia and its effect on rehabilitation**  
3 **outcomes: A randomized controlled trial**

4 **Short title: Inspiratory muscle training and stroke rehabilitation.**

5 Qianping Zhao<sup>\*¶</sup>, Chenlan Shao<sup>¶</sup>, Yongzheng Wang<sup>¶</sup>, Weiwei Zhao, Liang Wang, Wei  
6 Zhou, Yuxing Mo

7 The Rehabilitation Medicine Center, Peoples Hospital of Deyang City, Deyang,  
8 Sichuan Province, China.

9 \*Corresponding author

10 E-mail: qianpingzhaocqmu@126.com.(Q Z)

11 <sup>¶</sup>These authors contributed equally to this work.

12

13

## 14 **Abstract**

15 **Purpose:** The study aimed to verify the value of inspiratory muscle training (IMT)  
16 in the prevention of post-stroke sarcopenia, and to analyze the effects of IMT on the  
17 rehabilitation prognosis, including daily living activities, social regression, balance, and  
18 pneumonia, of stroke patients.

19 **Methods:** A total of 367 patients with a first stroke event were randomly allocated  
20 to an experimental group (n =164) and a control group (n =165). Both groups received  
21 conventional neurological rehabilitation treatment, and the experimental group also  
22 received IMT. After eight weeks of treatment, the incidence of post-stroke sarcopenia  
23 and pneumonia were analyzed and compared. The maximum inspiratory pressure (MIP)  
24 was assessed using a respiratory resistance trainer, and the Modified Barthel Index  
25 (MBI) was used to assess activities of daily living (ADL). The ability to return to society  
26 was assessed using the modified Rankin Scale (mRS), the trunk impact scale (TIS) was  
27 used to evaluate trunk balance in both groups before and after treatment, and the  
28 differences in MIP, MBI, mRS, and TIS between the two groups were analyzed.

29 **Results:** There were no significant differences in the baseline demographics  
30 between the two groups. After eight weeks of treatment, the incidence of post-stroke  
31 sarcopenia ( $P = 0.004$ ) and pneumonia ( $P = 0.017$ ) in the experimental group was  
32 lower than that in the control group. The trial group performed better than control group  
33 in MBI ( $P = 0.02$ , effect size  $d = 0.3$ ), TIS ( $P < 0.001$ , effect size  $d = 0.52$ ), MIP ( $P <$   
34  $0.001$ , effect size  $d = 0.4$ ) and mRS ( $P = 0.001$ , effect size  $d = 0.3$ ) scores after  
35 intervention.

36           **Conclusion:** Early inspiratory muscle training can effectively reduce the incidence  
37 of post-stroke sarcopenia and pneumonia and improve the rehabilitation prognosis of  
38 patients after stroke. (clinicaltrials.ChiCTR2200057067) .

39           **Keywords:** inspiratory muscle; sarcopenia; stroke; activities of daily living; trunk  
40 impact scale

## 41 **Introduction**

42           Stroke is a major contributor to disability, morbidity, and mortality, and thus poses  
43 a significant threat to human health. The skeletal muscles are often severely affected  
44 during post-stroke disability. Two-thirds of stroke patients suffer varying degrees of  
45 motor, cognitive, emotional, and social dysfunction, which can severely affect their  
46 quality of life. Stroke also has adverse effects on the effectiveness of coughing and  
47 respiratory muscle function [1–2], increasing the risk of aspiration and pneumonia and  
48 resulting in longer hospitalization, higher mortality, and worse functional outcome.

49           Primary sarcopenia is a progressive, systemic skeletal muscle disease  
50 characterized by reduced skeletal muscle mass, insufficient muscle strength, and  
51 physical dysfunction; it is commonly associated with age. However, not all sarcopenia  
52 is age-related and can occur in the process of specific systemic diseases [3], termed  
53 secondary sarcopenia. The secondary sarcopenia that occurs after stroke is termed post-  
54 stroke sarcopenia [4]. Previous studies have shown a 50% prevalence of post-stroke  
55 sarcopenia in the first month and 34% after six months [5], with an average prevalence  
56 over the first six months of 46.7% [6]. Its occurrence is related to factors such as post-  
57 stroke dyskinesia, eating disorders, inflammation, sympathetic activation, denervation,

58 and neuropathic pain [7]. Post-stroke sarcopenia can further aggravate the disability  
59 experienced by stroke patients and affect their functional outcomes such as balance,  
60 independent walking, and activities of daily living [3,8–9]. The improvement of post-  
61 stroke sarcopenia enhances the patient’s ability to perform daily activities and reduces  
62 the length of hospitalization [10]. Therefore, the active prevention and treatment of  
63 post-stroke sarcopenia are helpful to improve the rehabilitation and overall prognosis  
64 of stroke patients.

65 Most of the contralateral corticospinal tract is affected by stroke, leading to  
66 reduced strength in the contralateral limbs and trunk muscles, including the respiratory  
67 muscles. Studies have shown average reductions of 21.4% in the hemiplegic  
68 diaphragmatic activity in stroke patients compared with that in normal unaffected  
69 people [11], and the baseline average inspiratory muscle strength of subacute stroke  
70 patients was found to be only 46 cmH<sub>2</sub>O [12]. A study has shown that respiratory  
71 muscle strength is markedly related to limb muscle strength [13]. The respiratory  
72 muscle strength of healthy people, especially the strength of the inspiratory muscles, is  
73 positively correlated with indicators of sarcopenia such as limb muscle strength and the  
74 skeletal muscle index, and negatively correlated with the occurrence of sarcopenia.  
75 Reductions of 1 cmH<sub>2</sub>O in MIP and MEP can increase the probability of sarcopenia by  
76 8% and 7%, respectively [14]. While sarcopenia is a known complication of chronic  
77 obstructive pulmonary disease (COPD), it has been found that the sarcopenia  
78 incidence can be reduced by 28% after inspiratory muscle training [15]. Therefore,  
79 inspiratory muscle training may have preventive value for post-stroke sarcopenia.

80 However, information on the effects of inspiratory muscle training for stroke patients  
81 is limited. This study aimed to explore whether inspiratory muscle training can reduce  
82 the incidence of post-stroke sarcopenia, and analyze the influence of inspiratory muscle  
83 training on the rehabilitation prognosis of stroke patients, to further optimize the early  
84 rehabilitation program of stroke, improve the effectiveness of rehabilitation, and reduce  
85 the degree of disability after stroke.

## 86 **Methods**

### 87 **Study design and patient randomization**

88 This was a prospective single-blind randomized controlled trial. A stratified  
89 random method was used to assign patients to the two groups according to sex and age  
90  $\geq 65 / < 65$  years. The study was approved by the Ethics Committee (approval no. 2021-  
91 04-148-K01) of the People's Hospital of Deyang City, and was registered prospectively  
92 as a clinical trial (code: ChiCTR2200057067) in the Chinese Clinical Trial Registry.  
93 All participants signed an informed consent form.

### 94 **Sample Size**

95 To determine the required number of participants, we calculated the sample size  
96 based on the results of previous studies. The average incidence rate of sarcopenia within  
97 six months after stroke was found to be 46.7% [16]. Assuming a clinical difference of  
98 15%, 165 patients in each group would be required to test the difference between the  
99 two groups at 5% significance (two-tailed) and 80% confidence. If a loss to follow-up  
100 of 10% was taken into account, a minimum of 181 subjects in each group would be  
101 required. Thus, a total of 362 subjects would be required for the 2 groups.

## 102 **Participants**

103 A total of 367 stroke patients were recruited in the People's Hospital of Deyang  
104 City (Department of Rehabilitation Medicine, Department of Neurology and  
105 Neurosurgery) from May 2021 to October 2022. The patients were required to meet the  
106 following inclusion criteria: ① First unilateral stroke meeting the diagnostic criteria for  
107 stroke established at the Fourth National Academic Conference on Cerebrovascular  
108 Diseases in 1995; ② A course of disease  $\leq 4$  weeks; ③ A maximum inspiratory  
109 pressure  $< 60$  cmH<sub>2</sub>O; ④ A body mass index (BMI)  $> 18.5$  kg/m<sup>2</sup>; ⑤ Stable vital  
110 signs with no tracheal intubation and tracheotomy; ⑥ An ability to actively cooperate  
111 with the training without obvious cognitive impairment (MMSE score  $\geq 24$  points).  
112 Patients were excluded on the following grounds: ① Age  $< 18$  years; ② The presence  
113 of pre-stroke sarcopenia (SAFC-F score  $\geq 4$ , with calf circumferences below the  
114 threshold for men  $< 34$  cm and women  $< 33$  cm); ③ An inability to move out of bed;  
115 ④ The presence of autoimmune disease, malignant tumors, or serious liver and kidney  
116 diseases; ⑤ The presence of chronic respiratory diseases (such as COPD and  
117 pulmonary fibrosis), acute cardiovascular events within the past three months, or other  
118 diseases causing respiratory muscle damage (such as myasthenia gravis or Guillain-  
119 Barré syndrome); ⑥ An inability to complete the inspiratory muscle training due to  
120 severe facial paralysis or other oropharyngeal structural abnormalities.

## 121 **Interventions**

122 Patients in the control group underwent conventional neurorehabilitation treatment.  
123 This included comprehensive training for hemiplegic limbs (45 min/session, once daily),

124 power bicycle training (30 min/session, twice daily), hand function training (30  
125 min/session, twice daily), and physical factor therapy (45 min/session, once daily).  
126 Training was conducted five days per week for a total of eight weeks.

127 The experimental group received additional inspiratory muscle training (IMT) in  
128 addition to the conventional neurorehabilitation treatment given to the control group.  
129 The maximum inspiratory pressure (MIP) was measured before the first IMT, as  
130 follows. The patient used a respiratory endurance trainer (Model S2, XEEK Medical  
131 Appliance Company Limited) with the threshold resistance adjusted to 3 cmH<sub>2</sub>O while  
132 seated in a comfortable position, leaning forward slightly with calm abdominal  
133 breathing until the breathing was stable. The MIP was measured at the end of expiration  
134 by the patient inhaling as strongly as possible and holding the breath for 2-3-s; the  
135 measurement was repeated three times with the maximum value selected as the MIP.  
136 The IMT was measured by adjusting the resistance of the S2 training program to 30%  
137 of the MIP (the MIP was re-evaluated and resistance was adjusted according to the  
138 latest value obtained during the first training session every two weeks). While sitting  
139 comfortably and leaning forward slightly, the patients breathed calmly using abdominal  
140 breathing until the breathing was stable, followed by forcible inhalation to the  
141 maximum lung capacity at the end of expiration and removal of the filter with slow  
142 exhalation for approximately 6 s. This was performed 30 times/group, two groups per  
143 day, with one group in the morning and one group in the afternoon. The patient rested  
144 after each 3-5 repetitions, according to their degree of fatigue, and paid attention to  
145 quiet abdominal breathing and lip-contracting breathing during rest. The total training

146 time was 8 weeks, 5 days per week. IMT can be performed both with or without  
147 supervision. If the patient experienced dizziness, headache, dyspnea, or a decrease of  
148 more than 4% in oxygen saturation during the training, the training was halted.

## 149 **Observation Outcomes**

150 After eight weeks of training, a doctor or physical therapist evaluated the incidence  
151 of post-stroke sarcopenia and pneumonia in both groups. The MIP, activity of daily  
152 living (ADL), social regression, and balance functions were evaluated at baseline and  
153 after completing the interventions in both groups. The evaluators did not know the study  
154 purpose and the subject distribution.

## 155 **Primary Outcomes**

156 Incidence of post-stroke sarcopenia: After eight weeks of intervention, the grip  
157 strength and the calf circumference on the non-hemiplegic side were used as indicators  
158 to evaluate the incidence of sarcopenia in the two groups. According to the 2019 Asian  
159 Consensus on the Diagnosis and Treatment of Sarcopenia [17], the diagnosis of primary  
160 sarcopenia requires a decline in both muscle strength and muscle mass [17]. However,  
161 the use of the calf circumference has been proposed by many studies as an alternative  
162 index for evaluating skeletal muscle mass in stroke patients [18–21]. Therefore, in this  
163 study, the grip strength and calf circumference on the non-hemiplegic side were used  
164 for the diagnosis of post-stroke sarcopenia; sarcopenia was diagnosed when both  
165 measurements were below the thresholds of <28 kg grip strength for men and >18 kg  
166 for women and calf circumference of <34 cm for men and <33 cm for women [17].

167 Grip strength measurement: In the sitting position or the auxiliary sitting position,



168 the patient held the spring-type grip strength device in his hand and extended his elbow  
169 for two equal-length contractions with maximum force, with a one-minute rest after  
170 each. The maximum reading represented the grip strength.

171 Calf circumference measurement: the patient lay in the supine position in the  
172 morning, with the knee joint on the non-hemiplegic side flexed 90 degrees while the  
173 ankle joint was relaxed. The maximum calf circumference was measured using a non-  
174 elastic band.

## 175 **Secondary Outcomes**

176 Pneumonia incidence: The pneumonia incidence in the two groups was assessed  
177 during the training and was expressed as the ratio (%) of the number of cases of  
178 pneumonia to the total number of patients in each group.

179 Maximum inspiratory pressure (MIP): the MIP measurement was repeated three  
180 times to obtain the optimal value. The normal MIP values are  $120\pm 37$  for men and  
181  $84\pm 30$  for women[22]. The MIP measurement method was described in the intervention  
182 section.

183 Activities of daily living (ADL): The ADL was evaluated using the modified  
184 Barthel Index (MBI), which includes 10 items (eating, dressing, defecation, urination,  
185 toileting, walking, climbing up and down stairs, transferring, modifying, and bathing).  
186 The maximum score is 100, and patients who score more than 60 points can mostly take  
187 care of themselves. Scores of 40-60 points indicate moderate disability, dysfunction,  
188 and a requirement for help, while 20-40 points indicates severe disability with  
189 significant dependence, and patients who score below 20 are completely disabled and

190 dependent on others for daily living.

191 Social regression: Social regression was assessed with the modified Rankin scale  
192 (mRs).The criteria are as follows: 0 points, no symptoms; 1 point, the presence of  
193 symptoms but no obvious dysfunction and able to complete all daily tasks; 2 points,  
194 mild disability, with an inability to complete all pre-illness activities but can take care  
195 of his/her daily life without help; 3 points, moderate disability requiring some help but  
196 can walk independently; 4 points, moderate to severe disability, with an inability to  
197 walk independently and requiring help from others in daily life, 5 points, severe  
198 disability, bed rest, and complete dependence on others for daily life. Of a total score  
199 of 0-5 points, scores  $\leq 3$  indicate good function with the patient able to at least walk  
200 without help while scores  $> 3$  points indicate that the user has poor function and needs  
201 help in daily life such as walking.

202 Balance function: The trunk impairment scale (TIS) is a scale used for evaluating  
203 trunk balance in diseases of the nervous system disease and consists of 17 items. These  
204 include static sitting balance (3 items, 7 points in total), dynamic sitting balance (10  
205 items, 10 points in total), and trunk coordination (4 items, 6 points in total). The overall  
206 score ranges between 0 and 23 with higher scores indicating better balance. The scale  
207 has been tested for validity and reliability in stroke patients [23].

## 208 **Statistical Analysis**

209 All statistical analyses were performed using SPSS 22.0 statistical software and  
210 the Shapiro-Wilk test was used to test whether the variables conformed to the normal  
211 distribution. Enumeration data were expressed as percentages, and inter-group

212 comparisons were performed using the Chi-squared test. Measurement data were  
213 expressed as mean  $\pm$  standard deviation (mean  $\pm$  SD). If the data conformed to the  
214 normality and homoscedasticity, independent t-tests were used for inter-group  
215 comparisons, and paired t-tests were used for intra-group comparisons before and after  
216 treatment. The Mann-Whitney U test was used for inter-group comparisons of non-  
217 normality and the Wilcoxon signed rank-sum test was used for intra-group comparisons.  
218 The incidence of sarcopenia and pneumonia between the two groups was compared  
219 using the Chi-squared test. Two-sided tests were used for statistical analysis, and  $P$   
220  $<0.05$  indicated that the difference had statistical significance.

## 221 **Results**

### 222 **Baseline Characteristics of Participants**

223 Between May 2021 and October 2022, 700 patients were screened for study  
224 participation. Of these, 333 were excluded for various reasons, leaving 367 patients  
225 who were then enrolled in the study. The patients were randomly allocated to the  
226 experimental group ( $n=184$ ) and the control group ( $n=183$ ). During the study, 38  
227 patients withdrew from the study due to personal reasons (20 in the experimental group  
228 and 18 in the control group). Thus, 329 patients completed the study and were included  
229 in the analysis (Fig 1). No significant differences in general clinical data, NIHSS, mRS,  
230 MBI, MMSE, TIS, MIP, and calf circumference were observed at baseline between the  
231 two groups, and they were thus comparable ( $P>0.05$ , Table 1). We found no associated  
232 adverse effects either during or after treatment.

233 **Fig 1. Flow Diagram of the Study Protocol.**

234 **Table 1. Baseline Demographics of Both Groups.**

| Characteristic                | experimental group<br>(n = 184) | Control Group<br>(n = 183) | <i>P</i>          |
|-------------------------------|---------------------------------|----------------------------|-------------------|
| <b>Gender, n (%)</b>          |                                 |                            | 0.69 ‡            |
| <b>Men</b>                    | 73(48.7%)                       | 77(51.3%)                  |                   |
| <b>Women</b>                  | 91(50.8%)                       | 88(49.2%)                  |                   |
| <b>Age (year)</b>             | 61.32±8.79                      | 60.64±8.6                  | 0.48*             |
| <b>BMI (kg/m<sup>2</sup>)</b> | 22.46±2.19                      | 22.6±2.13                  | 0.54*             |
| <b>Etiology, n (%)</b>        |                                 |                            | 0.2 ‡             |
| <b>Ischemia</b>               | 79(48.2%)                       | 68(41.2%)                  |                   |
| <b>Hemorrhage</b>             | 85(51.8%)                       | 97(58.8%)                  |                   |
| <b>Hemiplegia, n (%)</b>      |                                 |                            | 0.2 ‡             |
| <b>Right</b>                  | 75(45.7%)                       | 64(38.8%)                  |                   |
| <b>Left</b>                   | 89(54.3%)                       | 101(61.2%)                 |                   |
| <b>Dominant hand, n (%)</b>   |                                 |                            |                   |
| <b>Right</b>                  | 180                             | 180                        |                   |
| <b>Left</b>                   | 0                               | 0                          |                   |
| <b>dysphagia, n (%)</b>       | 120(73.2%)                      | 125(75.8%)                 | 0.59‡             |
| <b>complication, n (%)</b>    | 156(95.1%)                      | 162(98.2%)                 | 0.12‡             |
| <b>hypertension</b>           | 99(60.4%)                       | 107(64.8%)                 | 0.4‡              |
| <b>diabetes</b>               | 55(33.5%)                       | 58(35.2%)                  | 0.76‡             |
| <b>hyperlipemia</b>           | 20(12.2%)                       | 16(9.7%)                   | 0.47‡             |
| <b>CHD</b>                    | 22(13.4%)                       | 26(15.8%)                  | 0.55‡             |
| <b>arrhythmia</b>             | 17(10.4%)                       | 12(7.3%)                   | 0.32‡             |
| <b>osteoporosis</b>           | 5(3%)                           | 5(3%)                      | 0.9‡              |
| <b>albumin</b>                | 37.5±4.7                        | 36.5±4.9                   | 0.4 <sup>#</sup>  |
| <b>prealbumin</b>             | 198±41.8                        | 193.58±41.62               | 0.3 <sup>#</sup>  |
| <b>C-reactive protein</b>     | 25.2±35.05                      | 24.6±36.92                 | 0.92 <sup>#</sup> |
| <b>hemoglobin</b>             | 130.34±16.39                    | 128.13±15.19               | 0.21*             |
| <b>RBC</b>                    | 4.31±0.56                       | 4.3±0.56                   | 0.83*             |
| <b>NIHSS</b>                  | 13.39±6.01                      | 12.89±6.05                 | 0.41 <sup>#</sup> |
| <b>mRS</b>                    | 3.48±0.63                       | 3.44±0.61                  | 0.4 <sup>#</sup>  |
| <b>MBI</b>                    | 44.09±11.76                     | 44.18±11.05                | 0.94*             |
| <b>MMSE</b>                   | 24.13±2.29                      | 24.1±2.2                   | 0.89 <sup>#</sup> |
| <b>TIS</b>                    | 11.29±2.53                      | 11.53±2.4                  | 0.3 <sup>#</sup>  |
| <b>MIP</b>                    | 31.36±8.95                      | 30.87±9.01                 | 0.62*             |
| <b>calf circumference</b>     | 31.99±4.37                      | 31.92±4.19                 | 0.8 <sup>#</sup>  |

235 Abbreviations: BMI, body mass index; CHD, coronary heart disease; RBC, Red blood

236 count; NIHSS, National Institute of Health stroke scale; mRS, modified Rankin scale;

237 MBI, modified barthel index; MMSE, Mini-mental State Examination; TIS, trunk

238 impact scale; MIP, maximum inspiratory pressure

239 #Analyzed by Mann-Whitney U test;

240 \*Analyzed by Independent t-test;

241 ‡Analyzed by ChiSquare test

## 242 **Primary Outcome**

### 243 **Comparison of incidence of post-stroke sarcopenia**

244 After eight weeks of intervention, the incidence of post-stroke sarcopenia in the  
245 experimental group was 22%, which was significantly lower than the 36.4% observed  
246 in the control group ( $P < 0.05$ , Fig 2).

247 **Fig 2 Comparison of Incidence of Post-stroke Sarcopenia.**

## 248 **Secondary Outcomes**

### 249 **Comparison of pneumonia incidence**

250 During the eight weeks of intervention, the pneumonia incidence in the  
251 experimental group was 7%, which was significantly less than that found in the control  
252 group (15.8%)( $P < 0.05$ , Fig 3).

253 **Fig 3 Comparison of pneumonia incidence.**

### 254 **Comparison of inspiratory muscle strength**

255 At the end of the treatment, both groups showed increased MIP values although  
256 the MIP values in the experimental group were significantly higher than those in the  
257 control group ( $P < 0.05$ ). The difference in the MIP values before and after the  
258 intervention also differed significantly between the two groups ( $P < 0.05$ , Table 2).

WITHDRAWN  
see manuscript DOI for details

260 **Table 2. Intra-group and Inter-group Comparisons of Two Groups of Secondary**

261 **Outcomes.**

|              | experimental group | Control Group | 95%CI          | <i>t</i> ( <i>P</i> ) | Cohen's <i>d</i> |
|--------------|--------------------|---------------|----------------|-----------------------|------------------|
| <b>MBI</b>   |                    |               |                |                       |                  |
| <b>T0</b>    | 44.09±11.76        | 44.18±11.05   | (-2.56,2.38)   | -0.07(0.94)           |                  |
| <b>T1</b>    | 65.27±11.31★       | 62.33±9.28★   | (0.7,5.19)     | 2.58(0.01)            | 0.3              |
| <b>T1-T0</b> | 21.18±9.77         | 18.15±8.03    | (1.09, 4.97)   | 3.08(0.002)           | 0.34             |
| <b>TIS</b>   |                    |               |                |                       |                  |
| <b>T0</b>    | 11.29±2.53         | 11.53±2.4     | (-0.78, 0.28)  | -1.04(0.3)            |                  |
| <b>T1</b>    | 17.59±5.06★        | 15.07±4.8★    | (1.44, 3.58)   | -4.17(<0.001)         | 0.52             |
| <b>T1-T0</b> | 6.29±2.53          | 3.54±2.4      | (2.22, 3.29)   | -8.75(<0.001)         | 1.12             |
| <b>MIP</b>   |                    |               |                |                       |                  |
| <b>T0</b>    | 31.36±8.95         | 30.87±9.01    | (-1.64, 2.06)  | 0.49(0.62)            |                  |
| <b>T1</b>    | 47.99±9.21★        | 43.97±9.14★   | (1.85, 5.66)   | 3.97(<0.001)          | 0.44             |
| <b>T1-T0</b> | 16.63±8.57         | 13.09±9.2     | (1.70, 5.39)   | 3.61(<0.001)          | 0.4              |
| <b>mRS</b>   |                    |               |                |                       |                  |
| <b>T0</b>    | 3.48±0.63          | 3.44±0.61     | (-0.09, 0.18)  | -0.85(0.4)            |                  |
| <b>T1</b>    | 2.53±0.79★         | 2.72±0.63★    | (-0.35, -0.04) | -2.54(0.01)           | 0.3              |
| <b>T1-T0</b> | 0.95±0.65          | 0.72±0.56     | (0.1,0.37)     | -3.42(0.001)          | 0.4              |
| <b>CC</b>    |                    |               |                |                       |                  |
| <b>T0</b>    | 31.99±4.37         | 31.92±4.19    | (0.86, 0.99)   | -0.24(0.81)           |                  |
| <b>T1</b>    | 33.26±3.39         | 31.59±3.22    | (0.95, 2.39)   | -5.01(<0.001)         | 0.5              |
| <b>T1-T0</b> | 1.27±2.36          | -0.33±2.71    | (1.06, 2.16)   | -4.79(<0.001)         | 0.37             |
| <b>grip</b>  |                    |               |                |                       |                  |
| <b>T1</b>    | 33.5±8.89          | 29.26±7.49    | (-2.45,6.02)   | -4.6(<0.001)          | 0.52             |

262 Abbreviations: mRS, modified Rankin scale; MBI, modified barthel index; TIS, trunk

263 impact scale; MIP, maximum inspiratory pressure. CC: calf circumference

264 ★ indicate significance intra-group comparisons

265 P values in boldface indicate significance inter-group comparison

266 T0 : Before intervention; T1 : after eight weeks of intervention; T1-T0: The

267 difference between T1 and T0

### 268 **Comparison of daily living activity (ADL)**

269 At the completion of the intervention, the MBI scores were increased in both  
270 groups with the scores in the experimental group being significantly higher than those  
271 of the control group ( $P < 0.05$ ). The difference in the MBI scores before and after the  
272 intervention also differed significantly between the two groups ( $P < 0.05$ , [Table 2](#)).

### 273 **Comparison of social regression**

274 The mRS scores in both groups after the intervention were observed to be lower  
275 than those before the intervention, with the mRS scores of patients in the experimental  
276 group being significantly better than those of patients in the control group ( $P < 0.05$ ).  
277 The differences in the mRS scores also differed significantly before and after the  
278 intervention between the two groups ( $P < 0.05$ , [Table 2](#)).

### 279 **Comparison of balancing function**

280 After completion of the intervention, the TIS scores were observed to have  
281 increased in both groups, with the scores of patients in the experimental group being  
282 significantly higher than those in the control group ( $P < 0.05$ ). The difference in the TIS  
283 scores before and after the intervention also differed significantly between the two  
284 groups ( $P < 0.05$ , [Table 2](#)).

## 285 **Discussion**



286 Stroke can lead to respiratory dysfunction such as respiratory muscle weakness  
287 and abnormal respiratory patterns resulting from both central and peripheral factors.  
288 Respiratory function plays an important role in motor ability and the response to most  
289 cardiopulmonary exercises. Decreased respiratory function is one of the main causes of  
290 non-vascular death after stroke [12]. Training of the respiratory muscles can improve  
291 the motor abilities of stroke patients and reduce the likelihood of stroke-related  
292 complications and mortality [12]. However, respiratory training for stroke patients has  
293 not been widely used in China, and there are few relevant studies either in China or  
294 abroad. The present study conducted a randomized controlled trial of the efficacy of  
295 inspiratory muscle training in patients after a first stroke. The results showed that the  
296 incidence of post-stroke sarcopenia and pneumonia in patients who received early  
297 inspiratory muscle training was lower than that in the control group. In addition, the  
298 treated patients performed better than those in the control group in their daily living  
299 activities, social regression, balance functions, and inspiratory muscle strength.  
300 Therefore, our study demonstrated that inspiratory muscle training is a simple, effective  
301 training method that helps to mitigate the incidence of post-stroke sarcopenia and  
302 promote functional recovery from stroke.

### 303 **Inspiratory muscle training and post-stroke sarcopenia**

304 To date, there are many studies on the association of chronic respiratory diseases  
305 with sarcopenia showing that reductions in respiratory muscle strength are associated  
306 with a high probability of sarcopenia as a complication of COPD [24]. Inspiratory  
307 muscle training has been found to help reduce the incidence of sarcopenia related to

308 [25]. Therefore, in addition to exercise and nutritional support, respiratory training is  
309 effective for reducing sarcopenia and its effects [25], possibly because respiratory  
310 training can improve the inspiratory muscle "blood steal" phenomenon and reduce limb  
311 skeletal muscle fatigue, thus improving exercise tolerance and reducing the risk of  
312 sarcopenia. Reduced activity, malnutrition, and other causes after stroke promote the  
313 occurrence of post-stroke sarcopenia. At present, there are few studies related to the  
314 treatment options for post-stroke sarcopenia. The present study showed that both the  
315 grip strength and calf circumference in the inspiratory muscle training group were  
316 markedly better than those in the control group, and the incidence of post-stroke  
317 sarcopenia in the experimental group was significantly lower than that in the control  
318 group. Previous studies have shown that the grip strength on the non-hemiplegic side is  
319 an independent predictor of the short-term functional prognosis after stroke [9], while  
320 atrophy of lower-limb muscles on the non-hemiplegic side is independently associated  
321 with an inability to walk independently after the stroke and is a factor influencing post-  
322 stroke limb disability [26], suggesting that limb strength on the non-hemiplegic side is  
323 related to the stroke prognosis. Relevant studies in healthy young people and the elderly  
324 have found that compared with non-sarcopenia patients, the average maximum  
325 respiratory pressure in sarcopenia patients is significantly reduced and negatively  
326 correlated with the incidence of sarcopenia [13,27]. Respiratory muscle strength,  
327 especially inspiratory muscle strength, has been used as a screening index for elderly  
328 sarcopenia in the community. Similar to the conclusions of the present study, the  
329 maximum inspiratory muscle strength of elderly male cardiovascular patients with

330 sarcopenia was found to be positively correlated with such sarcopenia indicators as grip  
331 strength, skeletal muscle mass index, and pace. The inspiratory muscle strength has  
332 been used as a diagnostic indicator of sarcopenia in elderly male cardiovascular patients  
333 [28–29], reflecting the close relationship between respiratory muscle strength and  
334 sarcopenia. The active prevention and treatment of the decline in respiratory muscle  
335 strength thus contribute to the prevention of sarcopenia.

### 336 **Inspiratory muscle training and MBI and mRS**

337 Dyskinesia represents the principal pathology seen after stroke and includes  
338 reduced respiratory muscle function, decreased thoracic expansion and limb mobility,  
339 and balance dysfunction. These dysfunctions affect the patients' activities of daily living  
340 and increase the risk of pneumonia. Lower limb strength in stroke patients is associated  
341 with poor muscle control and reduced activation of the primary motor cortex, both  
342 reducing function and inducing greater dependence. Recent studies have confirmed that  
343 pre-stroke sarcopenia is a predictor of poor mRS in stroke patients three months after  
344 the stroke [30], and post-stroke sarcopenia is related to poor prognosis, specifically in  
345 the ability to perform daily activities, overall improvement, and the possibility of  
346 hospital discharge [31]. This study showed that both social regression and the ability to  
347 perform daily living activities were improved to a greater extent in the experimental  
348 group than in the control group. On the one hand, this result may be attributed to the  
349 lower incidence of post-stroke sarcopenia. A cross-sectional study showed that  
350 improvements in post-stroke sarcopenia were related to a higher discharge rate and  
351 better functional independence rating scale (FIM) scores [32–33], suggesting that

352 sarcopenia treatment in stroke patients formed the basis of the improvements in  
353 performing daily activities. On the other hand, the impact of stroke on the  
354 cardiovascular, respiratory, and neuromuscular systems may affect cardiopulmonary  
355 health after stroke, and the cardiopulmonary function of stroke patients can remain  
356 reduced for several years [34]; inspiratory muscle training can effectively improve  
357 respiratory function, cardiopulmonary endurance, and reduce the incidence of  
358 pneumonia incidence after stroke [35–37]. Respiratory muscle training involves long  
359 and repeated resistance training of the respiratory muscles, which is conducive to  
360 improving respiratory endurance and allowing patients to make more effective use of  
361 the respiratory muscles in daily life [38]. Previous studies have shown that inspiratory  
362 muscle training can fully utilize the diaphragm and sternocleidomastoid muscle [39]  
363 while reducing sympathetic nervous activity [40] and promoting the development of a  
364 deep and slow breathing pattern beneficial to exercise in patients with COPD [41], as  
365 well as improving lung disease [42–43], asthma [44], chronic heart failure [40], chronic  
366 kidney disease [45], and spinal cord injury [46], as well as enhancing the inspiratory  
367 muscle strength, improving dyspnea, and thus the overall daily living and quality of life  
368 of patients. The present study found that the use of inspiratory muscle training  
369 combined with traditional physical therapy can accelerate recovery from stroke, the  
370 strengthening of the diaphragm and intercostal muscles allows patients to recover their  
371 respiratory function effectively, increasing their scores on the Functional Independence  
372 Rating Scale (FIM), the 6-minute walk test, the amount of fatigue severity, and the  
373 cognitive function score [47–48].

## 374 **Inspiratory muscle training and balance**

375 Our study found that the balance function of patients in the experimental group  
376 was superior to that of the control group, and the sarcopenia incidence in the  
377 experimental group was less than that in the control group. Sarcopenia has been shown  
378 to have a negative effect on balance, mobility, and overall function [9] and older  
379 individuals with sarcopenia are three times more likely to fall than non-sarcopenia  
380 patients [49]. Most stroke patients have decreased respiratory muscle strength. The  
381 decline in respiratory muscle strength usually affects the trunk stability of stroke  
382 patients. Asymmetric movements of the trunk, in turn, may impact respiratory muscle  
383 function. If not corrected in time, the reduced respiratory muscle function and trunk  
384 dysfunction will interact [50]. It has been demonstrated that respiratory training can be  
385 used as a trunk control training method in stroke patients [51]. Bosnak et al reported  
386 that inspiratory muscle training could increase both the quadriceps strength and balance  
387 function in patients with heart failure [52]. Inspiratory muscle training has also been  
388 widely applied to enhance the mobility and balance of the trunk core muscles in patients  
389 with COPD. A randomized controlled trial on 21 stroke patients examined the effects  
390 of inspiratory muscle training on the respiratory function, respiratory muscle strength,  
391 trunk control, balance, and overall function of stroke patients. The results showed a  
392 strong association between the trunk balance scale (TIS) and maximum inspiratory  
393 pressure (MIP) in the experimental group, and their effect size was higher [53]. The  
394 improvement in balance function induced by IMT might be attributable to two reasons.  
395 On the one hand, the inspiratory muscles belong to the core muscle group, and their

396 training helps to improve the thoracic movement of the trunk and the oxygen supply to  
397 the four limbs, thereby improving the balance of the trunk, transfer ability, and motor  
398 coordination of the limbs. On the other hand, inspiratory muscle training helps to  
399 prevent post-stroke sarcopenia, thereby indirectly preventing the reduction in balance  
400 function and the falls caused by post-stroke sarcopenia. However, a study found no  
401 relationship between respiratory muscle strength and functional ability, trunk control,  
402 and functional independence, and observed that the TIS score correlated only with the  
403 FEV1(%) [54]. Similarly, another study reported that inspiratory muscle training had  
404 no obvious beneficial effect on the balance of stroke patients, which might be related  
405 to bias induced by the small sample size (16 patients) in the study [55].

### 406 **Inspiratory muscle training and respiratory muscle strength**

407 The respiratory muscle strength of stroke patients is only about half of that  
408 expected for healthy adults [56], and the average maximum inspiratory pressure (MIP)  
409 is 17-57 cmH<sub>2</sub>O [12], which is lower than the threshold of 60 cmH<sub>2</sub>O for inspiratory  
410 muscle weakness in patients with nervous system diseases [57]. The decrease in  
411 respiratory muscle strength is closely related to reduced cardiopulmonary endurance in  
412 stroke patients who have an approximately 40% lower motor capacity than people who  
413 are sedentary. The decline in MIP is an independent risk factor for heart failure,  
414 myocardial infarction, and cardiovascular death, and may increase the risk of stroke  
415 [58]. MIP is an indicator for the evaluation of inspiratory muscle strength. The  
416 inspiratory muscle training carries out threshold training by the repeated application of  
417 appropriate resistance to the inspiratory muscle, and the respiratory muscle will respond

418 adaptively like any other skeletal muscle to improve respiratory muscle strength [38].  
419 Early respiratory muscle training contributes to the improvement of pulmonary function  
420 after stroke [59]. Without respiratory training, the respiratory function in stroke patients  
421 fails to return to normal within a recovery period of up to 9 months [60]. Inspiratory  
422 muscle training is currently mainly used for the rehabilitation of patients with COPD,  
423 heart failure, and myasthenia gravis. In this study, the inspiratory muscle strength stroke  
424 after IMT was significantly improved in the experimental group compared with that of  
425 the control group, and the pneumonia incidence was less than that of the control group.  
426 This is consistent with the results of randomized controlled studies of subacute stroke  
427 patients [34]. Their research confirmed that six weeks of comprehensive respiratory  
428 training resulted in significant improvements in respiratory muscle strength,  
429 cardiopulmonary endurance, motor ability, and the dyspnea index, and it was possible  
430 to reduce the risk of stroke recurrence and mortality associated with various  
431 cardiovascular and cerebrovascular diseases by improving the maximum oxygen uptake.  
432 Research on inspiratory muscle training shows that inspiratory muscle training can  
433 significantly improve the thickness of the diaphragm, the MIP, and inspiratory muscle  
434 endurance after stroke [61]. Respiratory training resulted in an increase in the MIP of 7  
435 cmH<sub>2</sub>O, which was conducive to improving cardiopulmonary endurance and reducing  
436 the incidence of pneumonia [12,36,37,57].

## 437 **Limitations**

438 There were some limitations in this study. First, the grip strength was not measured  
439 at baseline to diagnose post-stroke sarcopenia; this was mainly because acute stroke

440 patients are in a weak state and it is difficult to accurately assess their grip strength.  
441 However, grip strength is still one of the important indicators for the diagnosis of  
442 sarcopenia. Second, the results of the study only showed the difference between the two  
443 groups after intervention. Therefore, further studies are required to observe its long-  
444 term rehabilitation value.

## 445 **Conclusion**

446 Early inspiratory muscle training as used with neural rehabilitation in patients after  
447 a first stroke can reduce the incidence of post-stroke sarcopenia and pneumonia,  
448 improve the inspiratory muscle strength and balance functions, and improve both daily  
449 living and social regression. Early inspiratory muscle training can not only improve  
450 respiratory muscle function but also provide stable trunk support for the recovery of  
451 limb function; this recovery process is in accordance with the law of neurophysiological  
452 development from the central area to the limbs. These findings will enhance our  
453 understanding of the integration of inspiratory muscle training into routine neurological  
454 rehabilitation programs for stroke.

## 455 **Acknowledge**

456 We would like to express sincere thanks to all the physiotherapists who  
457 participated in this research and Deyang People's Hospital for their support.

458

459

## 460 **References**

461 1. Smith Hammond CA, Goldstein LB, Zajac DJ, Gray L, Davenport PW, Bosler DC.



- 462 Assessment of aspiration risk in stroke patients with quantification of voluntary  
463 cough. *Neurology* 2001;56: 502–506.
- 464 2. Lasserson D, Mills K, Arunachalam R, Polkey M, Moxham J, Kalra L. Differences  
465 in motor activation of voluntary and reflex cough in humans. *Thorax* 2006;61:  
466 699–705.
- 467 3. Scherbakov N, von Haehling S, Anker SD, Dirnagl U, Doehner W. Stroke induced  
468 Sarcopenia: muscle wasting and disability after stroke. *Int J Cardiol.* 2013;170: 89–  
469 94.
- 470 4. Scherbakov N, Sandek A, Doehner W. Stroke-related sarcopenia: Specific  
471 characteristics. *J Am Med Dir Assoc.* 2015;16; 272–276.
- 472 5. Su Y, Yuki M, Otsuki M. Prevalence of stroke-related sarcopenia: A systematic  
473 review and meta-analysis. *J Stroke Cerebrovasc Dis.* 2020;29: 105092.
- 474 6. Yao R, Yao L, Rao A, Ou J, Wang W, Hou Q, et al. Prevalence and risk factors of  
475 stroke-related sarcopenia at the subacute stage: A case control study. *Front Neurol.*  
476 2022;13: 899658.
- 477 7. Li W, Yue T, Liu Y. New understanding of the pathogenesis and treatment of  
478 stroke-related sarcopenia. *Biomed Pharmacother.* 2020;131: 110721.
- 479 8. Tanimoto Y, Watanabe M, Sun W, Sugiura Y, Tsuda Y, Kimura M, et al.  
480 Association between sarcopenia and higher-level functional capacity in daily living  
481 in community-dwelling elderly subjects in Japan. *Arch Gerontol Geriatr.* 2012;55:  
482 e9–13.
- 483 9. Yi Y, Shim JS, Oh BM, Seo HG. Grip Strength on the Unaffected Side as an

- 484 Independent Predictor of Functional Improvement After Stroke. *Am J Phys Med*  
485 *Rehabil.* 2017;96: 616–620.
- 486 10. Matsushita T, Nishioka S, Taguchi S, Yamanouchi A, Okazaki Y, Oishi K, et al.  
487 Effect of Improvement in Sarcopenia on Functional and Discharge Outcomes in  
488 Stroke Rehabilitation Patients. *Nutrients.* 2021;13: 2192.
- 489 11. Park GY, Kim SR, Kim YW, Jo KW, Lee EJ, Kim YM, et al. Decreased diaphragm  
490 excursion in stroke patients with dysphagia as assessed by M-mode sonography.  
491 *Arch Phys Med Rehabil.* 2015;96: 114–121.
- 492 12. Menezes KK, Nascimento LR, Ada L, Polese JC, Avelino PR, Teixeira-Salmela  
493 LF. Respiratory muscle training increases respiratory muscle strength and reduces  
494 respiratory complications after stroke: a systematic review. *J Physiother.* 2016;62:  
495 138–144.
- 496 13. Shin HI, Kim DK, Seo KM, Kang SH, Lee SY, Son S. Relation Between  
497 Respiratory Muscle Strength and Skeletal Muscle Mass and Hand Grip Strength in  
498 the Healthy Elderly. *Ann Rehabil Med.* 2017;41: 686–692.
- 499 14. Pedreira RBS, Fernandes MH, Brito TA, Pinheiro PA, Coqueiro RDS, Carneiro  
500 JAO. Are maximum respiratory pressures predictors of sarcopenia in the elderly?  
501 *J Bras Pneumol.* 2022;48: e20210335.
- 502 15. Jones SE, Maddocks M, Kon SS, Canavan JL, Nolan CM, Clark AL, Polkey MI,  
503 Man WD. Sarcopenia in COPD: prevalence, clinical correlates and response to  
504 pulmonary rehabilitation. *Thorax.* 2015;70: 213–218.
- 505 16. Yao R, Yao L, Rao A, Ou J, Wang W, Hou Q, Xu C, Gao BL. Prevalence and risk

- 506 factors of stroke-related sarcopenia at the subacute stage: A case control study.  
507 Front Neurol. 2022;13: 899658.
- 508 17. Chen LK, Woo J, Assantachai P, Auyeung TW, Chou MY, Iijima K, et al. Asian  
509 Working Group for Sarcopenia: 2019 Consensus Update on Sarcopenia Diagnosis  
510 and Treatment. J Am Med Dir Assoc. 2020;21: 300–307.e2.
- 511 18. Inoue T, Maeda K, Shimizu A, Nagano A, Ueshima J, Sato K, et al. Calf  
512 circumference value for sarcopenia screening among older adults with stroke. Arch  
513 Gerontol Geriatr. 2021;93: 104290.
- 514 19. Nishioka S, Yamanouchi A, Matsushita T, Nishioka E, Mori N, Taguchi S.  
515 Validity of calf circumference for estimating skeletal muscle mass for Asian  
516 patients after stroke. Nutrition. 2021;82: 111028.
- 517 20. Yao R, Yao L, Yuan C, Gao BL. Accuracy of Calf Circumference Measurement,  
518 SARC-F Questionnaire, and Ishii's Score for Screening Stroke-Related Sarcopenia.  
519 Front Neurol. 2022;13: 880907.
- 520 21. Kawakami R, Murakami H, Sanada K, Tanaka N, Sawada SS, Tabata I, et al. Calf  
521 circumference as a surrogate marker of muscle mass for diagnosing sarcopenia in  
522 Japanese men and women. Geriatr Gerontol Int. 2015;15: 969–976.
- 523 22. Bruschi C, Cerveri I, Zoia MC, Fanfulla F, Fiorentini M, Casali L, et al. Reference  
524 values of maximal respiratory mouth pressures: a population-based study. Am Rev  
525 Respir Dis. 1992;146: 790–793.
- 526 23. Verheyden G, Nieuwboer A, Mertin J, Preger R, Kiekens C, De Weerd W. The  
527 trunk impairment scale: a new tool to measure motor impairment of the trunk after

- 528 stroke. *Clin Rehabil.* 2004;18: 326–334.
- 529 24. Lage VKDS, de Paula FA, Dos Santos JM, Costa HS, da Silva GP, Lima LP, et al.  
530 Are oxidative stress biomarkers and respiratory muscles strength associated with  
531 COPD-related sarcopenia in older adults? *Exp Gerontol.* 2022;157: 111630.
- 532 25. Jones SE, Maddocks M, Kon SS, Canavan JL, Nolan CM, Clark AL, et al.  
533 Sarcopenia in COPD: prevalence, clinical correlates and response to pulmonary  
534 rehabilitation. *Thorax.* 2015;70: 213–218.
- 535 26. Nozoe M, Kanai M, Kubo H, Yamamoto M, Shimada S, Mase K. Non-paretic  
536 lower limb muscle wasting during acute phase is associated with dependent  
537 ambulation in patients with stroke. *J Clin Neurosci.* 2020;74: 141–145.
- 538 27. Ro HJ, Kim DK, Lee SY, Seo KM, Kang SH, Suh HC. Relationship Between  
539 Respiratory Muscle Strength and Conventional Sarcopenic Indices in Young  
540 Adults: A Preliminary Study. *Ann Rehabil Med.* 2015;39: 880–887.
- 541 28. Kodric M, Trevisan R, Torregiani C, Cifaldi R, Longo C, Cantarutti F, et al.  
542 Inspiratory muscle training for diaphragm dysfunction after cardiac surgery. *J*  
543 *Thorac Cardiovasc Surg.* 2013;145: 819–823.
- 544 29. Izawa KP, Watanabe S, Oka K, Kasahara Y, Morio Y, Hiraki K, et al. Respiratory  
545 muscle strength in relation to sarcopenia in elderly cardiac patients. *Aging Clin*  
546 *Exp Res.* 2016;28: 1143–1148.
- 547 30. Matsushita T, Nishioka S, Taguchi S, Yamanouchi A. Sarcopenia as a predictor of  
548 activities of daily living capability in stroke patients undergoing rehabilitation.  
549 *Geriatr Gerontol Int.* 2019;19: 1124–1128.

- 550 31. Yoshimura Y, Wakabayashi H, Bise T, Nagano F, Shimazu S, Shiraishi A, et al.  
551 Sarcopenia is associated with worse recovery of physical function and dysphagia  
552 and a lower rate of home discharge in Japanese hospitalized adults undergoing  
553 convalescent rehabilitation. *Nutrition*. 2019;61: 111–118.
- 554 32. Matsushita T, Nishioka S, Taguchi S, Yamanouchi A, Okazaki Y, Oishi K, et al.  
555 Effect of Improvement in Sarcopenia on Functional and Discharge Outcomes in  
556 Stroke Rehabilitation Patients. *Nutrients*. 2021;13: 2192.
- 557 33. Nagano F, Yoshimura Y, Bise T, Shimazu S, Shiraishi A. Muscle mass gain is  
558 positively associated with functional recovery in patients with sarcopenia after  
559 stroke. *J Stroke Cerebrovasc Dis*. 2020;29: 105017.
- 560 34. Sutbeyaz ST, Koseoglu F, Inan L, Coskun O. Respiratory muscle training improves  
561 cardiopulmonary function and exercise tolerance in subjects with subacute stroke:  
562 a randomized controlled trial. *Clin Rehabil*. 2010;24: 240–250.
- 563 35. Fan Q, Jia J. Translating Research Into Clinical Practice: Importance of Improving  
564 Cardiorespiratory Fitness in Stroke Population. *Stroke* 2020;51: 361–367.
- 565 36. Zhang X, Zheng Y, Dang Y, Wang L, Cheng Y, Zhang X, et al. Can inspiratory  
566 muscle training benefit patients after stroke? A systematic review and meta-  
567 analysis of randomized controlled trials. *Clin Rehabil*. 2020;34: 866–876.
- 568 37. Messaggi-Sartor M, Guillen-SolàA, Depolo M, Duarte E, Rodríguez DA, Barrera  
569 MC, et al. Inspiratory and expiratory muscle training in subacute stroke: A  
570 randomized clinical trial. *Neurology* 2015;85: 564–572.
- 571 38. Menezes KK, Nascimento LR, Avelino PR, Alvarenga MTM, Teixeira-Salmela

- 572 LF. Efficacy of Interventions to Improve Respiratory Function After Stroke. *Respir*  
573 *Care* 2018;63: 920–933.
- 574 39. Lee CT, Chien JY, Hsu MJ, Wu HD, Wang LY. Inspiratory muscle activation  
575 during inspiratory muscle training in patients with COPD. *Respir Med.* 2021;190:  
576 106676
- 577 40. Mello PR, Guerra GM, Borile S, Rondon MU, Alves MJ, Negrão CE, et al.  
578 Inspiratory muscle training reduces sympathetic nervous activity and improves  
579 inspiratory muscle weakness and quality of life in patients with chronic heart  
580 failure: a clinical trial. *J Cardiopulm Rehabil Prev.* 2012;32: 255–261.
- 581 41. Charususin N, Gosselink R, McConnell A, Demeyer H, Topalovic M, Decramer  
582 M, et al. Inspiratory muscle training improves breathing pattern during exercise in  
583 COPD patients. *Eur Respir J.* 2016;47: 1261–1264.
- 584 42. Hoffman M, Augusto VM, Eduardo DS, Silveira BMF, Lemos MD, Parreira VF.  
585 Inspiratory muscle training reduces dyspnea during activities of daily living and  
586 improves inspiratory muscle function and quality of life in patients with advanced  
587 lung disease. *Physiother Theory Pract.* 2021;37: 895–905.
- 588 43. Langer D, Ciavaglia C, Faisal A, Webb KA, Neder JA, Gosselink R, et al.  
589 Inspiratory muscle training reduces diaphragm activation and dyspnea during  
590 exercise in COPD. *J Appl Physiol(1985).* 2018;125: 381–392.
- 591 44. Lage SM, Pereira DAG, Corradi Magalhães Nepomuceno AL, Castro AC, Araújo  
592 AG, Hoffman M, et al. Efficacy of inspiratory muscle training on inspiratory  
593 muscle function, functional capacity, and quality of life in patients with asthma: A

- 594 randomized controlled trial. *Clin Rehabil.* 2021;35: 870–881.
- 595 45. de Medeiros AIC, Fuzari HKB, Rattesa C, Brandão DC, de Melo Marinho PÉ.  
596 Inspiratory muscle training improves respiratory muscle strength, functional  
597 capacity and quality of life in patients with chronic kidney disease: a systematic  
598 review. *J Physiother.* 2017;63: 76–83.
- 599 46. Woods A, Gustafson O, Williams M, Stiger R. The effects of inspiratory muscle  
600 training on inspiratory muscle strength, lung function and quality of life in adults  
601 with spinal cord injuries: a systematic review and Meta-analysis. *Disabil Rehabil.*  
602 2022;5: 1–12.
- 603 47. Healthcare Engineering JO. Retracted:Effect of Respiratory Training Combined  
604 with Core Muscle Training on the Overall Motor Function and Activities of Daily  
605 Living of Patients with Early and Midterm Stroke. *J Healthc Eng.* 2022;2022:  
606 9873642.
- 607 48. Sørensen SL, Kjeldsen SS, Mortensen SS, Hansen UT, Hansen D, Pedersen AR,  
608 et al. "More air-better performance-faster recovery": study protocol for randomised  
609 controlled trial of the effect of post-stroke inspiratory muscle training for adults.  
610 *Trials* 2021;22: 575.
- 611 49. Landi F, Liperoti R, Russo A, Giovannini S, Tosato M, Capoluongo E, et al.  
612 Sarcopenia as a risk factor for falls in elderly individuals:results from the  
613 ilSIRENTE study. *Clin Nutr.* 2012;31: 652–658.
- 614 50. Emerich Gordon K, Reed O. The Role of the Pelvic Floor in Respiration:A  
615 Multidisciplinary Literature Review. *J Voice* 2020;34: 243–249.

- 616 51. Lee K, Cho JE, Hwang DY, Lee W. Decreased Respiratory Muscle Function Is  
617 Associated with Impaired Trunk Balance among Chronic Stroke Patients: A Cross-  
618 sectional Study. *Tohoku J Exp Med.* 2018;245: 79–88.
- 619 52. Bosnak-Guclu M, Arikan H, Savci S, Inal-Ince D, Tulumen E, Aytemir K, et al.  
620 Effects of inspiratory muscle training in patients with heart failure. *Respir Med.*  
621 2011;105: 1671–1681.
- 622 53. Aydoğan Arslan S, Uğurlu K, Sakizli Erdal E, Keskin ED, DemirgüçA. Effects of  
623 Inspiratory Muscle Training on Respiratory Muscle Strength, Trunk Control,  
624 Balance and Functional Capacity in Stroke Patients: A single-blinded randomized  
625 controlled study. *Top Stroke Rehabil.* 2022;29: 40–48.
- 626 54. Boz K, Saka S, Çetinkayaİ. The relationship of respiratory functions and  
627 respiratory muscle strength with trunk control, functional capacity, and functional  
628 independence in post-stroke hemiplegic patients. *Physiother Res Int.* 2022: e1985.  
629 doi: 10.1002/pri.1985.
- 630 55. Tovar-Alcaraz A, de Oliveira-Sousa SL, León-Garzón MC, González-Carrillo MJ.  
631 Efectos del entrenamiento muscular inspiratorio sobre la función respiratoria y el  
632 equilibrio en supervivientes de ictus: un ensayo clínico controlado aleatorizado  
633 [Effects of inspiratory muscle training on respiratory function and balance in stroke  
634 survivors:a randomized controlled trial]. *Rev Neurol.* 2021;72: 112–120.
- 635 56. Jung KJ, Park JY, Hwang DW, Kim JH, Kim JH. Ultrasonographic diaphragmatic  
636 motion analysis and its correlation with pulmonary function in hemiplegic stroke  
637 patients. *Ann Rehabil Med.* 2014;38: 29–37.



- 638 57. Farrero E, Antón A, Egea CJ, Almaraz MJ, Masa JF, Utrabo I, et al. Sociedad  
639 Española de Neumología y Cirugía Torácica(SEPAR).Guidelines for the  
640 management of respiratory complications in patients with neuromuscular disease.  
641 Sociedad Española de Neumología y Cirugía Torácica(SEPAR). Arch  
642 Bronconeumol. 2013;49: 306–313. English, Spanish.
- 643 58. Frankenstein L, Nelles M, Meyer FJ, Sigg C, Schellberg D, Remppis BA, et al.  
644 Validity, prognostic value and optimal cutoff of respiratory muscle strength in  
645 patients with chronic heart failure changes with beta-blocker treatment. Eur J  
646 Cardiovasc Prev Rehabil. 2009;16: 424–429.
- 647 59. Yoo HJ, Pyun SB. Efficacy of Bedside Respiratory Muscle Training in Patients  
648 With Stroke: A Randomized Controlled Trial. Am J Phys Med Rehabil. 2018;97:  
649 691–697.
- 650 60. Jung JH, Shim JM, Kwon HY, Kim HR, Kim BI. Effects of Abdominal Stimulation  
651 during Inspiratory Muscle Training on Respiratory Function of Chronic Stroke  
652 Patients. J Phys Ther Sci. 2014;26: 73–76.
- 653 61. Cho JE, Lee HJ, Kim MK, Lee WH. The improvement in respiratory function by  
654 inspiratory muscle training is due to structural muscle changes in patients with  
655 stroke: a randomized controlled pilot trial. Top Stroke Rehabil. 2018;25: 37–43.

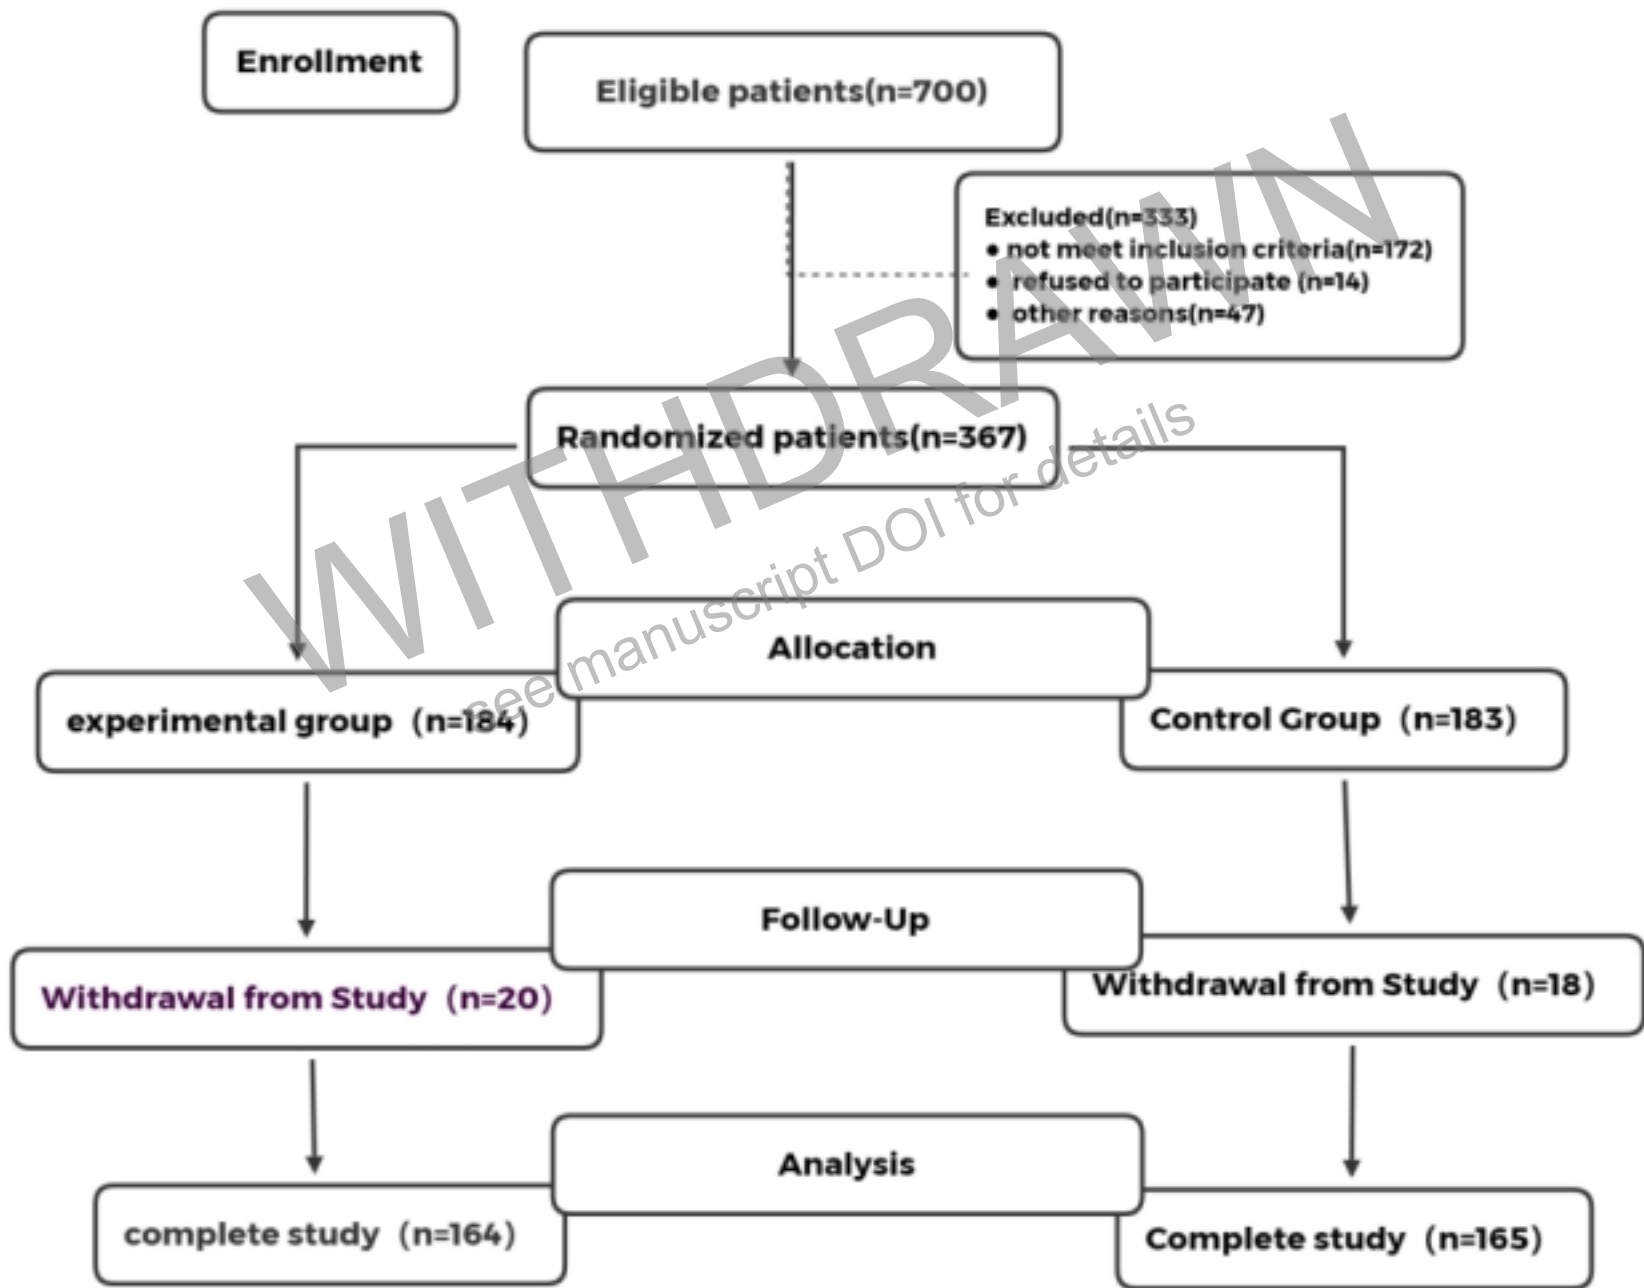

Figure

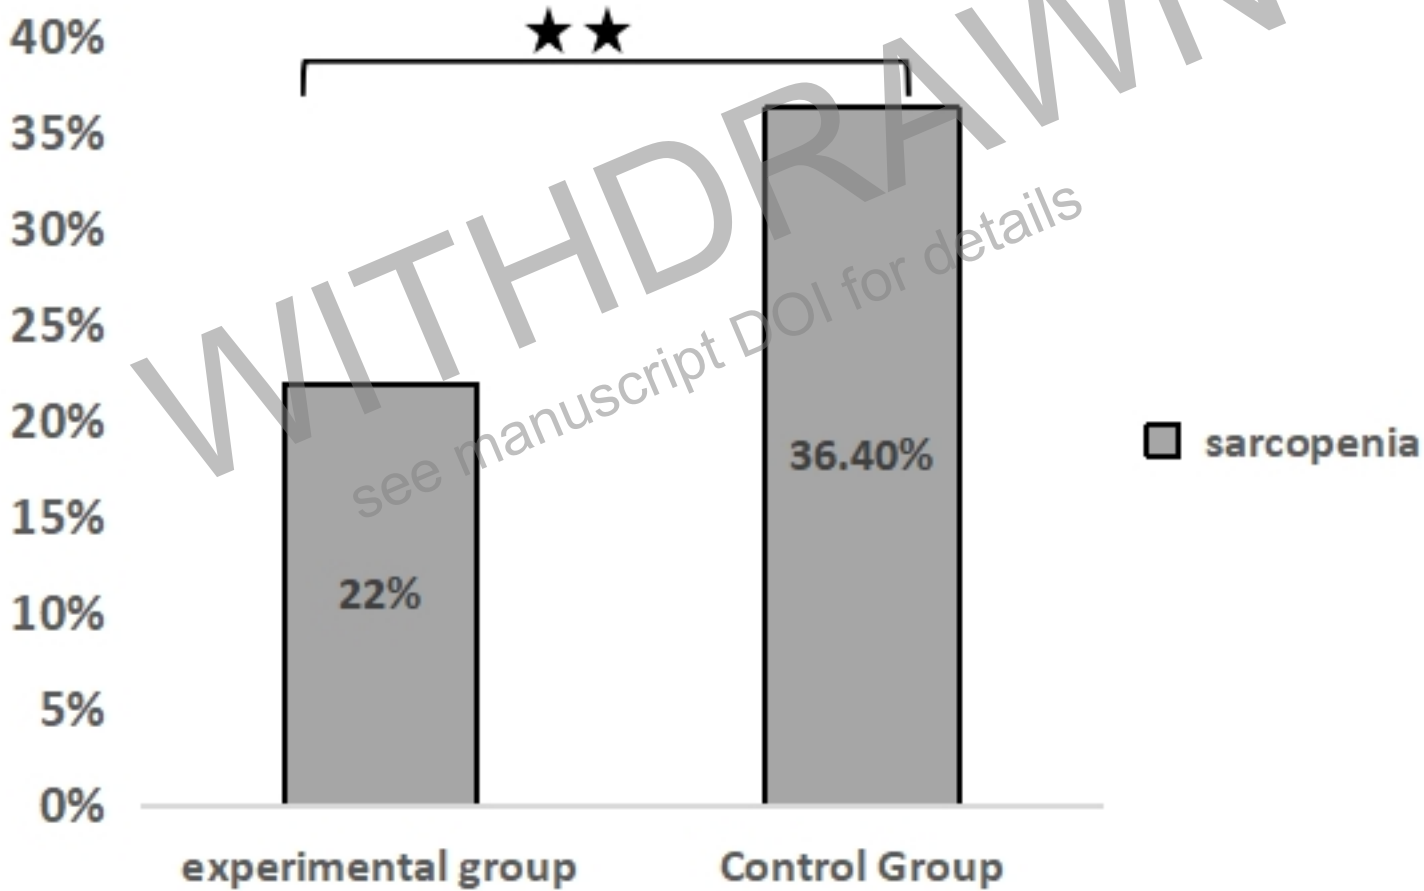

Figure

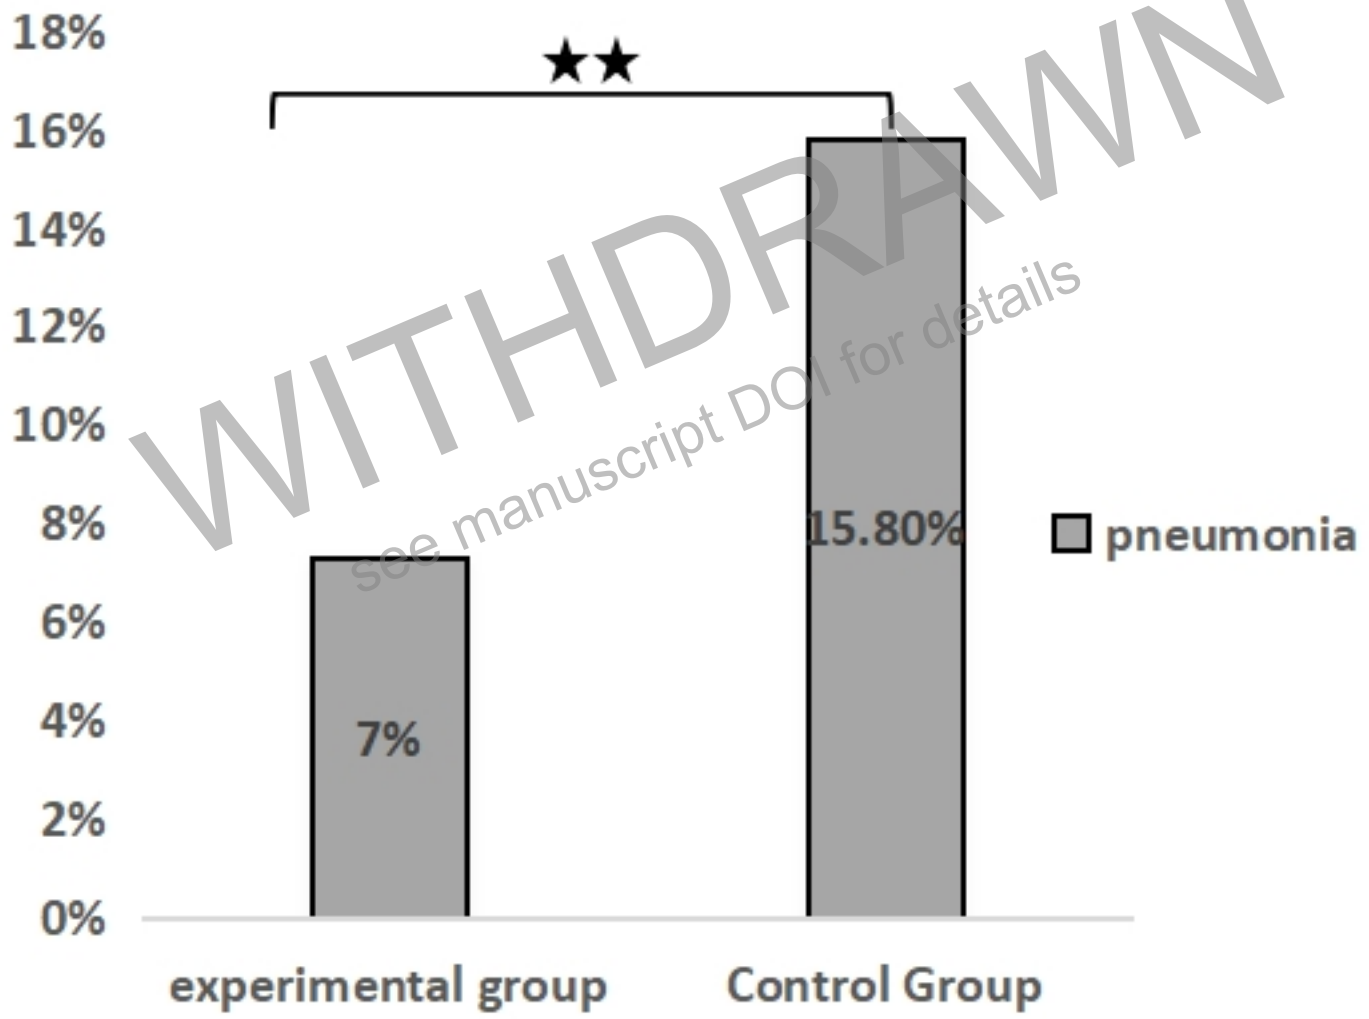

Figure
